# Supplementary material
Source: MDPI journal article supplement (https://www.mdpi.com/search?q=molbank-2021-M1272)
Supplement: s002 [file molbank-2021-M1272-s002.inchi]

InChI=1S/C8H12N2O3/c1-6-5-7(12)9-8(13)10(6)3-2-4-11/h5,11H,2-4H2,1H3,(H,9,12,13)
AuxInfo=1/1/N:9,11,10,12,4,3,5,1,6,2,13,7,8/rA:13CNCCCNOOCCCCO/rB:s1;s2;d3;s4;s1s5;d5;d1;s3;s2;s10;s11;s12;/rC:-1.3408,.77,0;0,.0125,0;1.3265,.7948,0;1.3121,2.3348,0;-.0287,3.0923,0;-1.3552,2.3098,0;-.0431,4.6323,0;-2.6673,-.0125,0;2.6673,.0373,0;.0144,-1.5275,0;-1.3121,-2.3098,0;-1.2977,-3.8498,0;-2.6242,-4.6323,0;
