# Supplementary material
Source: MDPI journal article supplement (https://www.mdpi.com/search?q=molbank-2021-M1272)
Supplement: s002 [file molbank-2021-M1272-s002.mol]

Cordaro.mol
  ChemDraw07272111292D

 13 13  0  0  0  0  0  0  0  0999 V2000
   -0.7183    0.4125    0.0000 C   0  0  0  0  0  0  0  0  0  0  0  0
    0.0000    0.0067    0.0000 N   0  0  0  0  0  0  0  0  0  0  0  0
    0.7106    0.4258    0.0000 C   0  0  0  0  0  0  0  0  0  0  0  0
    0.7029    1.2508    0.0000 C   0  0  0  0  0  0  0  0  0  0  0  0
   -0.0154    1.6566    0.0000 C   0  0  0  0  0  0  0  0  0  0  0  0
   -0.7260    1.2374    0.0000 N   0  0  0  0  0  0  0  0  0  0  0  0
   -0.0231    2.4816    0.0000 O   0  0  0  0  0  0  0  0  0  0  0  0
   -1.4289   -0.0067    0.0000 O   0  0  0  0  0  0  0  0  0  0  0  0
    1.4289    0.0200    0.0000 C   0  0  0  0  0  0  0  0  0  0  0  0
    0.0077   -0.8183    0.0000 C   0  0  0  0  0  0  0  0  0  0  0  0
   -0.7029   -1.2374    0.0000 C   0  0  0  0  0  0  0  0  0  0  0  0
   -0.6952   -2.0624    0.0000 C   0  0  0  0  0  0  0  0  0  0  0  0
   -1.4058   -2.4816    0.0000 O   0  0  0  0  0  0  0  0  0  0  0  0
  1  2  1  0      
  2  3  1  0      
  3  4  2  0      
  4  5  1  0      
  5  6  1  0      
  6  1  1  0      
  5  7  2  0      
  1  8  2  0      
  3  9  1  0      
  2 10  1  0      
 10 11  1  0      
 11 12  1  0      
 12 13  1  0      
M  END
