# Supplementary material
Source: MDPI journal article supplement (https://www.mdpi.com/search?q=molbank-2021-M1272)
Supplement: s003 [file molbank-2021-M1272-s003.mol]

Scheme 1.cdx
  ChemDraw07272111192D

 14 14  0  0  0  0  0  0  0  0999 V2000
   -1.0774    0.4125    0.0000 C   0  0  0  0  0  0  0  0  0  0  0  0
   -0.3591    0.0067    0.0000 N   0  0  0  0  0  0  0  0  0  0  0  0
    0.3514    0.4258    0.0000 C   0  0  0  0  0  0  0  0  0  0  0  0
    0.3437    1.2508    0.0000 C   0  0  0  0  0  0  0  0  0  0  0  0
   -0.3745    1.6566    0.0000 C   0  0  0  0  0  0  0  0  0  0  0  0
   -1.0851    1.2374    0.0000 N   0  0  0  0  0  0  0  0  0  0  0  0
   -0.3822    2.4816    0.0000 O   0  0  0  0  0  0  0  0  0  0  0  0
   -1.7880   -0.0067    0.0000 O   0  0  0  0  0  0  0  0  0  0  0  0
   -0.3514   -0.8183    0.0000 C   0  0  0  0  0  0  0  0  0  0  0  0
   -1.0620   -1.2374    0.0000 C   0  0  0  0  0  0  0  0  0  0  0  0
   -1.0543   -2.0624    0.0000 C   0  0  0  0  0  0  0  0  0  0  0  0
   -1.7649   -2.4816    0.0000 O   0  0  0  0  0  0  0  0  0  0  0  0
    1.0697    0.0200    0.0000 C   0  0  0  0  0  0  0  0  0  0  0  0
    1.7880   -0.3858    0.0000 O   0  0  0  0  0  0  0  0  0  0  0  0
  1  2  1  0      
  2  3  1  0      
  3  4  2  0      
  4  5  1  0      
  5  6  1  0      
  6  1  1  0      
  5  7  2  0      
  1  8  2  0      
  2  9  1  0      
  9 10  1  0      
 10 11  1  0      
 11 12  1  0      
  3 13  1  0      
 13 14  2  0      
M  STY  1   1 SUP
M  SLB  1   1   1
M  SAL   1  2  13  14
M  SBL   1  1  13
M  SMT   1 CHO
M  SCL   1  
M  SBV   1  13   -0.7183    0.4058
M  END
